# Supplementary material
Source: Springer Nature journal article supplement (https://www.springermedizin.de/resource/supplementary/13054_2012_941_MOESM4_ESM.pdf/9709290)

**A****Initial PAM clustering**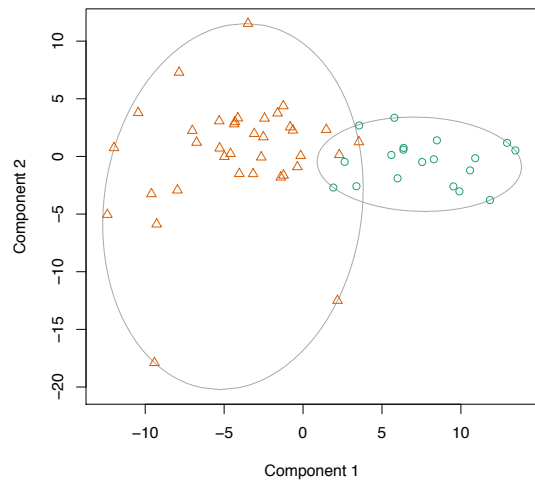**B****Post-enrichment PAM clustering**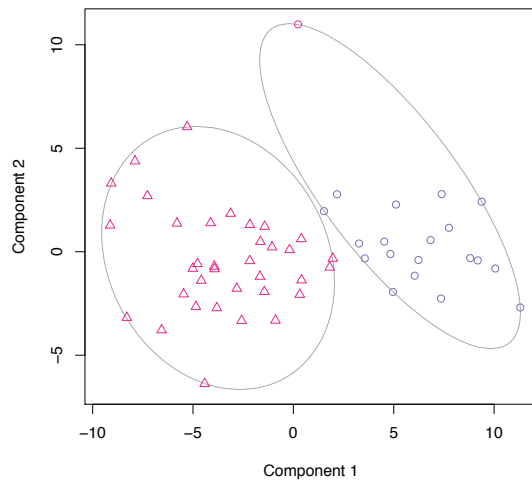**C****Final PAM clustering**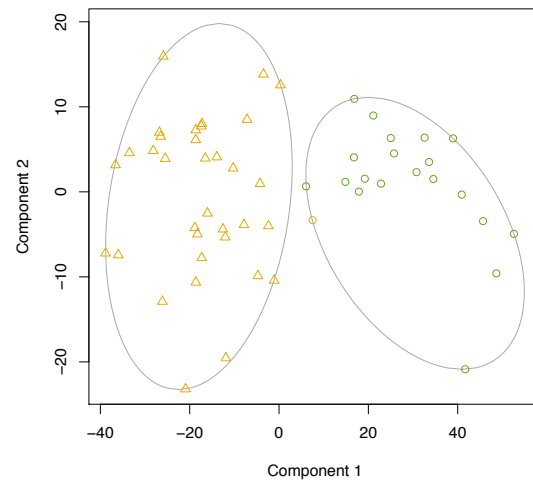

Supplement: MOESM4 [file 9709290]
